# Supplementary material for: Antisense noncoding mitochondrial RNA-2 gives rise to miR-4485-3p by Dicer processing in vitro
Source: PubMed Central journal article supplement (PMC8527801; doi:10.1186/s40659-021-00356-0), 2021-10-19
Supplement: 40659_2021_356_MOESM1_ESM.pdf [file 40659_2021_356_MOESM1_ESM.pdf]

## Step 1

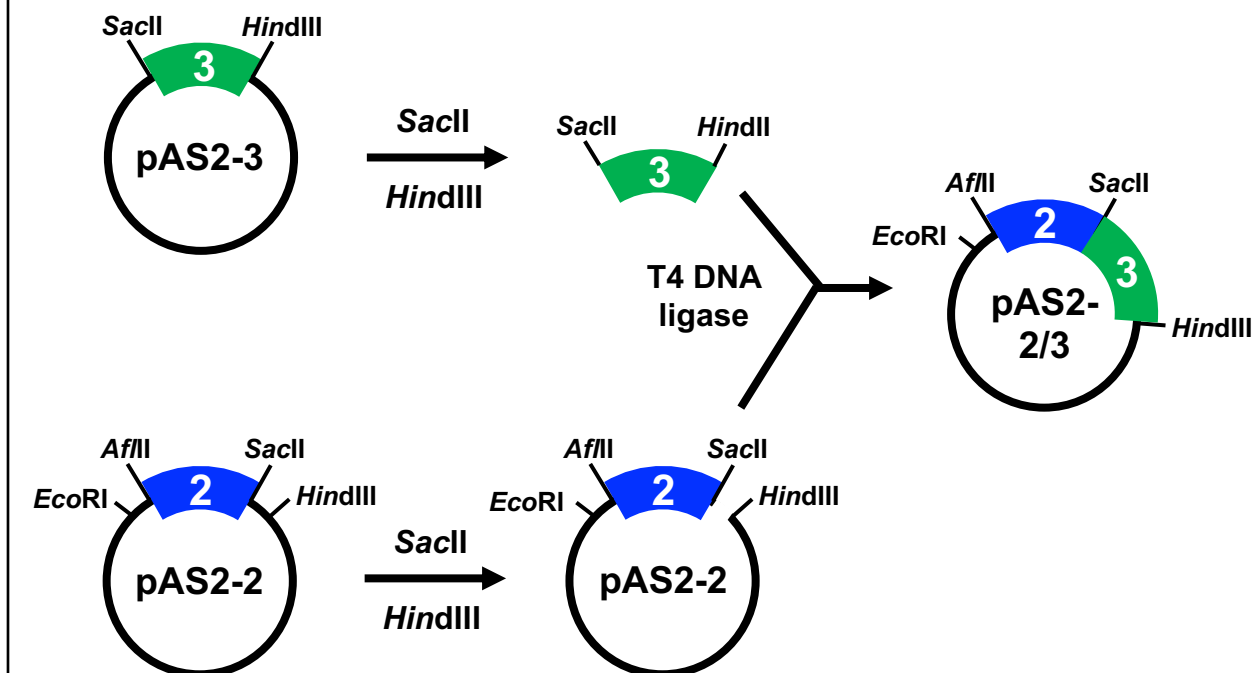

## Step 2

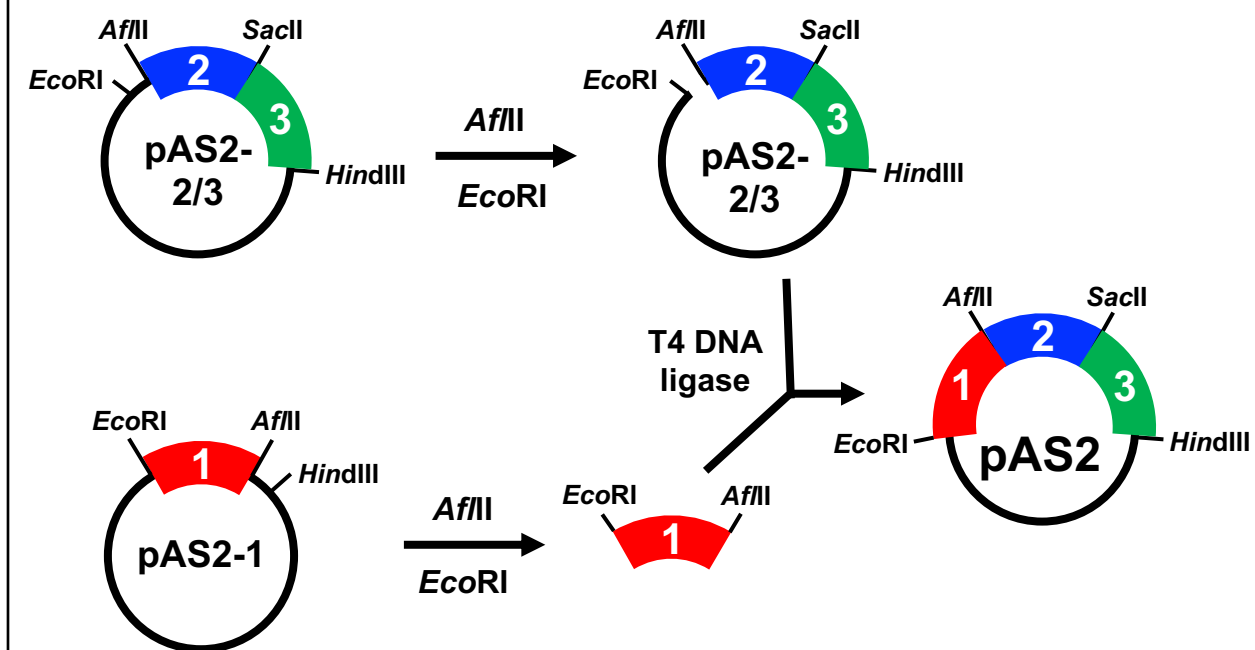

**Additional File 1. Stepwise cloning scheme for ASncmtRNA-2.** Colors of inserts cloned into pUC57 are the same as the corresponding RNA segments shown in Figure 1A. Only pertinent restriction sites are shown.
