# Supplementary material for: Antisense noncoding mitochondrial RNA-2 gives rise to miR-4485-3p by Dicer processing in vitro
Source: PubMed Central journal article supplement (PMC8527801; doi:10.1186/s40659-021-00356-0), 2021-10-19
Supplement: 40659_2021_356_MOESM2_ESM.pdf [file 40659_2021_356_MOESM2_ESM.pdf]

**Additional File 2: Sequence of Primers**

| Name | Sequence 5' – 3'                   | Tm |
|------|------------------------------------|----|
| 1    | GTAAAACGACGGCCAG                   | 52 |
| 2    | TAATACGACTCACTATAGGTACCTAAAAAATCCC | 57 |
| 3    | GGTAAGATTTGCCGAGTTC                | 54 |
| 4    | ACCCACCCAAGAACAGG                  | 55 |
| 5    | CCTGTTCTTGGGTGGGT                  | 56 |
| 6    | TAGGGATAACAGCGCAATCCTATT           | 56 |
| 7    | AATAGGATTGCGCTGTTATCCCTA           | 57 |
| 8    | AACCTCCGAGCAGTACATG                | 56 |
| 9    | AGTGATTATGCTACCTTTGCACGGT          | 60 |
| 10   | GAACTCGGCAAACCTTACC                | 54 |
| 11   | GGTTGATTGTAGATATTGGGCT             | 53 |
| 12   | AGCCCAATATCTACAATCAACC             | 53 |
| 13   | ACCTATAAATCTTCCCACTATTTT           | 50 |
| 14   | GGCTAAACCTAGCCCCAAACCC             | 60 |
| 15   | CAGGAAACAGCTATGAC                  | 52 |
