# Supplementary material for: Antisense noncoding mitochondrial RNA-2 gives rise to miR-4485-3p by Dicer processing in vitro
Source: PubMed Central journal article supplement (PMC8527801; doi:10.1186/s40659-021-00356-0), 2021-10-19
Supplement: 40659_2021_356_MOESM3_ESM.pdf [file 40659_2021_356_MOESM3_ESM.pdf]

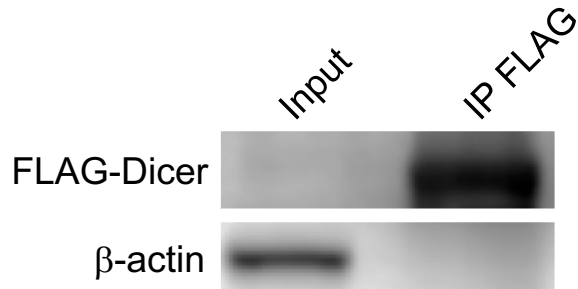

**Additional File 3. Expression of FLAG-tagged recombinant Dicer.** HEK293T cells were transfected for 48 h with pDicer-FLAG. Lysate was then immunoprecipitated with anti-FLAG antibody and Western blot detection was performed on the immunoprecipitate (IP-FLAG) and the whole lysate (Input), using the anti-FLAG antibody.  $\beta$ -actin was used as internal control.
