# Supplementary material for: Antisense noncoding mitochondrial RNA-2 gives rise to miR-4485-3p by Dicer processing in vitro
Source: PubMed Central journal article supplement (PMC8527801; doi:10.1186/s40659-021-00356-0), 2021-10-19
Supplement: 40659_2021_356_MOESM4_ESM.pdf [file 40659_2021_356_MOESM4_ESM.pdf]

**Additional File 4: Sequence of Probes.**

| Name      | Sequence 5' – 3'                                                                                                                                                                                       |
|-----------|--------------------------------------------------------------------------------------------------------------------------------------------------------------------------------------------------------|
| P-AS2a    | GGGTTTGTTAGGTAAGTGTGTCATGCCCCGCCTCTTCACGGGCAGGTCA<br>TCTTCTCGTCTTGCTGTGTCATGCCCCGCCTCTTCACGGGCAGGTCA<br>ATTTCACTGGTTAAAAGTAAGAGACAGCTGAACCCTCGTGGAGCCA<br>TTCATACAGGTCCCTATTTAAGGAACAAGTGATTATGCTACCTT |
| P-AS2b    | TTGCACGGTTAGGGTACCGCGGCCGTTAAACATGTGTCACTGGGC<br>AGGCGGTGCCTCTAATACTGGTGATGCTAGAGGTGATGTTTTTGGT<br>AAACAGGCGGGGTAAGGTTTGCCGAGTTCCTTTTACTTTTTTTAACC<br>TTTCCTTATGAGCATGCCTGTGTTGGGTTGACAGTGAGGGTAATAA   |
| P-AS2c    | TGACTTGTTGGTTGATTGTAGATATTGGGCTGTTAATTGTCAGTTCA<br>GTGTTTTGATCTGACGCAGGCTTATGCGGAGGAGAATGTTTTTCATG<br>TACTTATACTAACATTAGTTCTTCTATAGGGTGATAGATTGGTCCA<br>ATTGGGTGTGAGGAGTTCAGTTATATGTTTGGGATTTTTTAGGTA  |
| P-4485-3p | TTAGGGTACCGCGGCCGTTA*                                                                                                                                                                                  |

\*Estimated  $T_m$ , calculated as DNA/RNA hybrid in 5X SSC (idtdna.com), and subtracting 2.4 – 2.9°C per molarity of formamide [19] (11.1 M), is between 39.2 and 44.8°C.
